# Supplementary material for: A new-AIE-ligand-based metal–organic framework “turn-on” sensor with extremely high sensitivity
Source: Royal Society of Chemistry journal article supplement (doi:10.1039/d3nj02818f), 2023-01-01
Supplement: d3nj02818f1.pdf [file d3nj02818f1.pdf]

## Supporting Information

### A New-AIE-ligand-based metal-organic framework “turn-on” sensor with extremely high sensitivity

Jinfang Zhang<sup>a,\*</sup>, Wenjing Li<sup>a</sup>, Simeng Ren<sup>a</sup>, Shunchang Zhao<sup>a</sup>, Xingyu Tao<sup>a</sup>,  
Qinghan Chen<sup>a</sup>, Dejing Yin<sup>b</sup> and Chi Zhang<sup>a,c,\*</sup>

<sup>a</sup> International Joint Research Center for Photoresponsive Molecules and Materials, School of  
Chemical and Material Engineering, Jiangnan University, Wuxi 214122, P. R. China

<sup>b</sup> School of Biotechnology, Jiangnan University, Wuxi 214122, P. R. China

<sup>c</sup> School of Chemical Science and Engineering, Tongji University, Shanghai 200092, P. R. China

#### Table of contents

**Table S1.** Selected bond lengths(Å)and angles for **1**.

**Figure S1.** The crystal structure of 3-L.

**Figure S2.** (a) the asymmetric unit of **1**; (b) the coordination environments of Cd.

**Figure S3.** The PXRD analysis of **1**.

**Figure S4.** The thermogravimetric analyses (TGA) of **1**.

**Figure S5.** The IR spectra of **1** before and after sensing Bi<sup>3+</sup> and Fe<sup>3+</sup>.

**Figure S6.** Luminescence spectra of 3-L in DMF/water mixture with various water fractions ( $f_w$ ).

**Figure S7.** The particle size distribution of the suspension.

**Figure S8.** the excitation and emission spectra of the water suspensions of **1**.

**Figure S9.** Optical images of **1** before and after sensing Bi<sup>3+</sup> and Fe<sup>3+</sup>.

**Figure S10.** XPS spectra before and after sensing Bi<sup>3+</sup> and Fe<sup>3+</sup>: (a) total survey, (b) Bi 4f and (c) Fe 2p.

**Figure S11.** Absorption spectra of Bi<sup>3+</sup> and Fe<sup>3+</sup> and the excitation and emission of **1**.

**Table S1** Selected bond lengths(Å)and angles for **1**.

| Bond          | Lengths(Å) | Bond               | Angles(°) |
|---------------|------------|--------------------|-----------|
| Cd(02)-O(1)   | 2.4531(19) | O(2)-Cd(02)-O(5)   | 152.65(8) |
| Cd(02)-O(2)   | 2.314(2)   | O(2)-Cd(02)-N(00L) | 103.06(9) |
| Cd(02)-O(3)   | 2.444(2)   | O(5)-Cd(02)-N(00L) | 81.16(7)  |
| Cd(02)-O(4)   | 2.410(2)   | O(2)-Cd(02)-N(1)   | 86.08(8)  |
| Cd(02)-O(5)   | 2.3655(19) | O(5)-Cd(02)-N(1)   | 85.93(7)  |
| Cd(02)-N(1)   | 2.395(2)   | N(00L)-Cd(02)-N(1) | 166.05(8) |
| Cd(02)-N(00L) | 2.374(2)   | O(2)-Cd(02)-O(4)   | 72.28(9)  |
|               |            | O(5)-Cd(02)-O(4)   | 81.24(8)  |
|               |            | N(00L)-Cd(02)-O(4) | 85.64(8)  |

Symmetry transformations used to generate equivalent atoms: #1  $x-1/2, -y+1/2, z-1/2$ ;

#2  $-x+3/2, y+1/2, -z+1/2$ ; #3  $-x+3/2, y-1/2, -z+1/2$ ; #4  $x+1/2, -y+1/2, z+1/2$

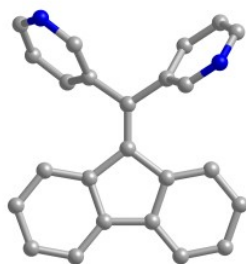

**Figure S1.** The crystal structure of 3-L (N: blue; C, gray; H atoms are omitted).

(a)

(b)

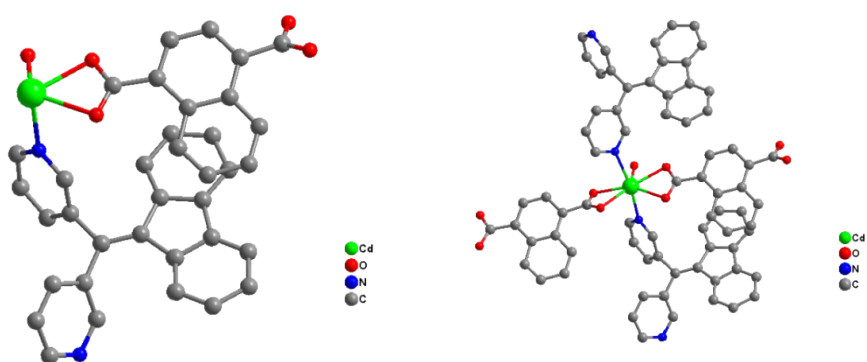

**Figure S2.** (a) the asymmetric unit of **1**; (b) the coordination environment of Cd.

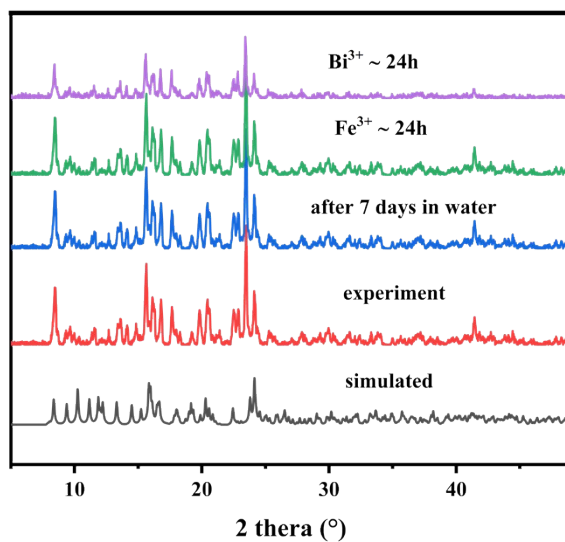

**Figure S3.** The PXRD analysis of **1**.

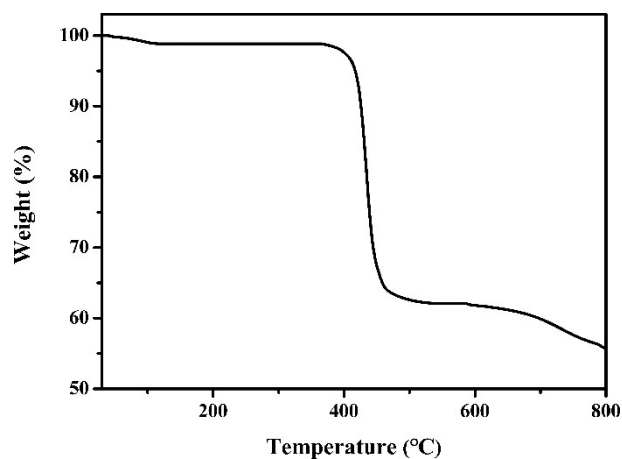

**Figure S4.** The thermogravimetric analyses (TGA) of **1**.

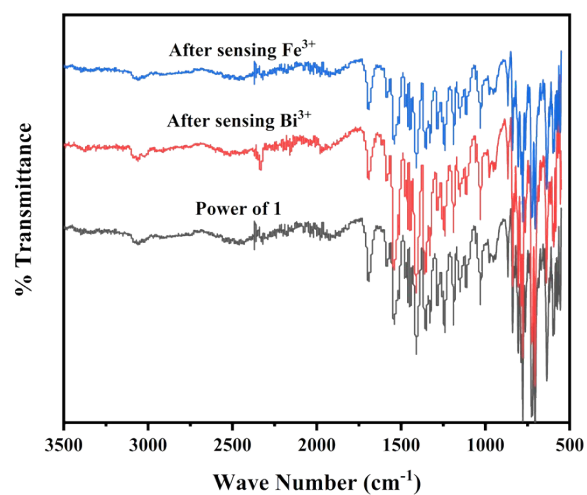

**Figure S5.** IR spectra of **1** before and after sensing  $\text{Bi}^{3+}$  and  $\text{Fe}^{3+}$ .

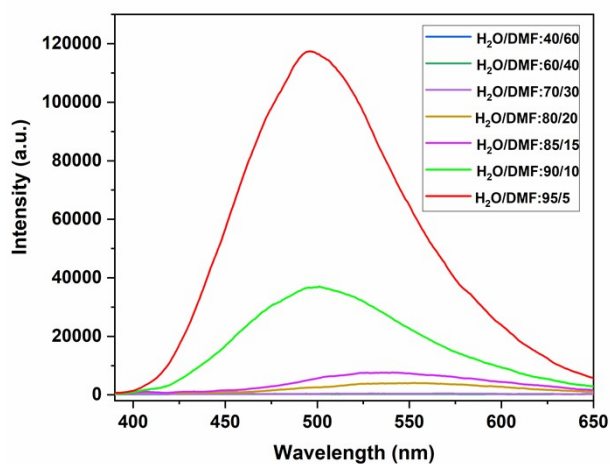

**Figure S6.** Luminescence spectra of **3-L** in DMF/water mixture with various water

fractions ( $f_w$ ).

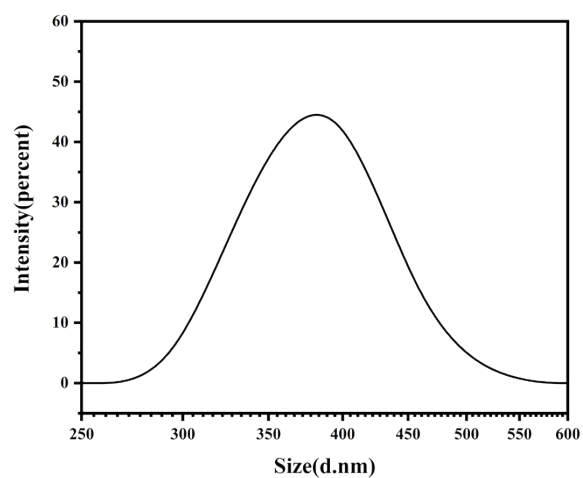

**Figure S7.** The particle size distribution of the suspension of **1** in H<sub>2</sub>O.

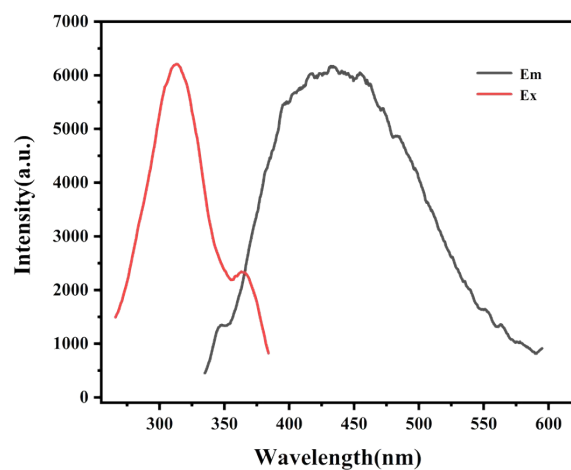

**Figure S8.** The excitation and emission spectra of the water suspensions of **1**.

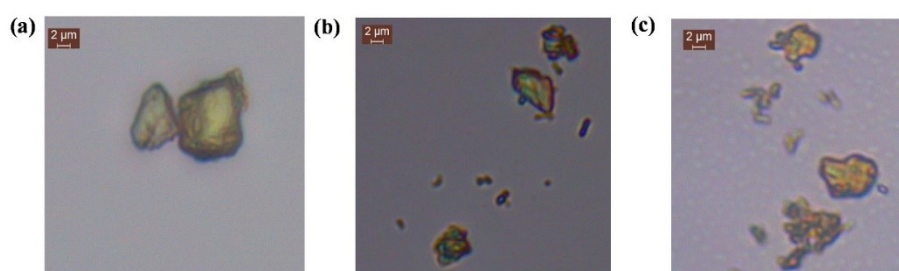

**Figure S9.** Optical images of **1** before and after sensing Bi<sup>3+</sup> and Fe<sup>3+</sup> achieved by Leica Microsystems.

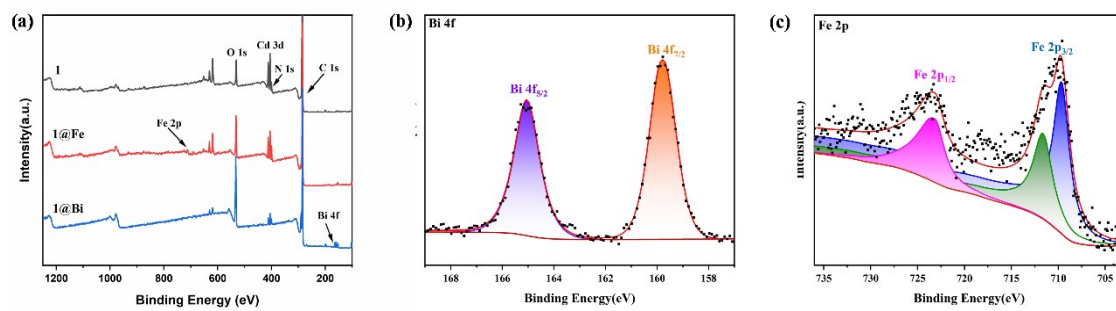

**Figure S10.** XPS spectra before and after sensing  $\text{Bi}^{3+}$  and  $\text{Fe}^{3+}$ : (a) total survey, (b) Bi 4f and (c) Fe 2p.

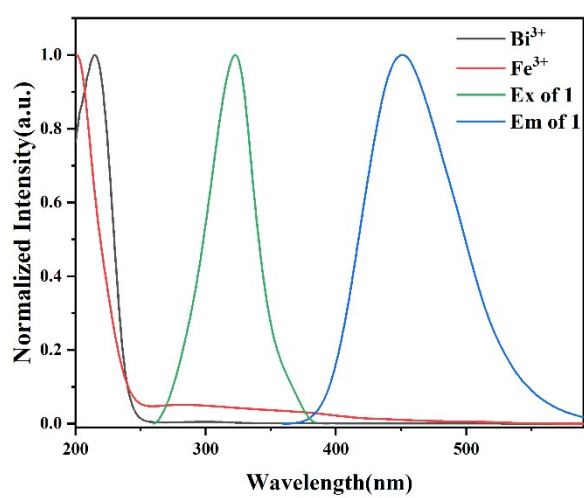

**Figure S11.** Absorption spectra of  $\text{Bi}^{3+}$  and  $\text{Fe}^{3+}$  and the excitation and emission of **1**.
